# Supplementary material
Source: MDPI journal article supplement (https://www.mdpi.com/2073-4395/13/6/1643)
Supplement: s1 [file s1]

Archive with 4 entries (4 files):
- Figure S1.tif
- Figure S2 cont.tif
- Figure S2.tif
- Figure S3.pdf
