# Supplementary material
Source: MDPI journal article supplement (https://www.mdpi.com/2073-4395/13/6/1643)

**Figure S3 Preliminary outcomes of several horticultural species** a, c, e, fruits from untreated and pollinated flowers (seeds can be observed); b, d, f, fruits from sulfur-treated and pollinated flowers (asymmetric formation of seed or no seeds can be observed); g, i, untreated and pollinated flowers of eggplant and watermelon (with pollen tubes growing inside the stigma); h, j, sulfur-treated and pollinated flowers (with no pollen tubes).

*C+* (not treated and pollinated)

*S* (treated with sulfur ( $S_8$ ) and pollinated)

Cucumber (*Cucumis sativus* L.)

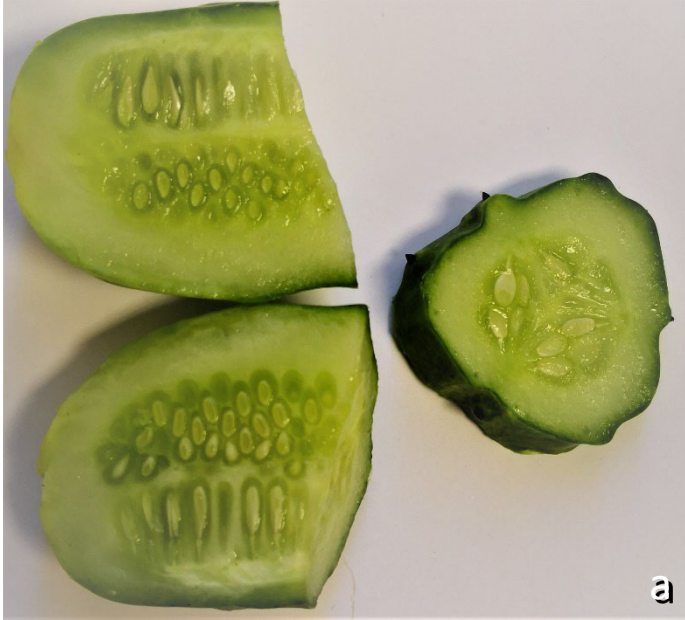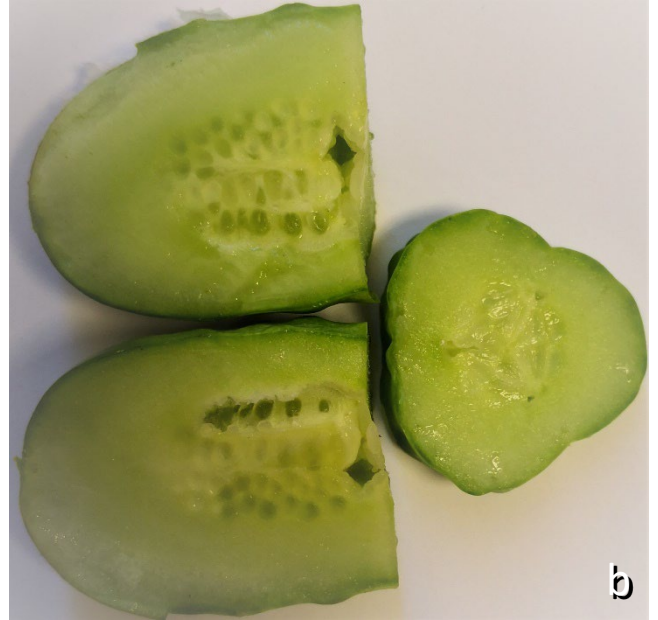

Eggplant (*Solanum melongena* L.)

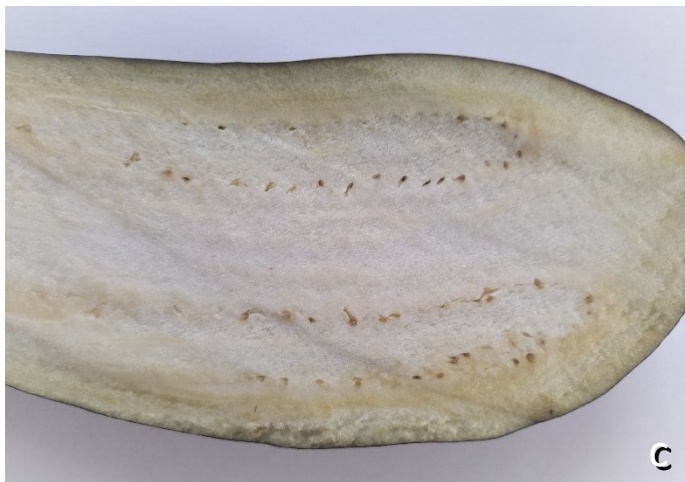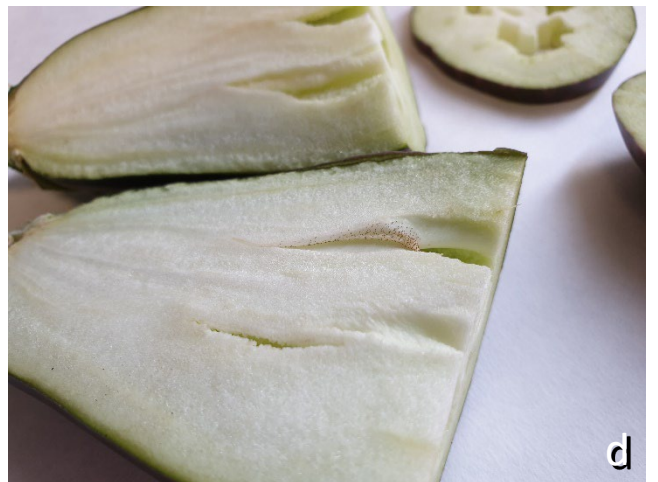

Melon (*Cucumis melo* L.)

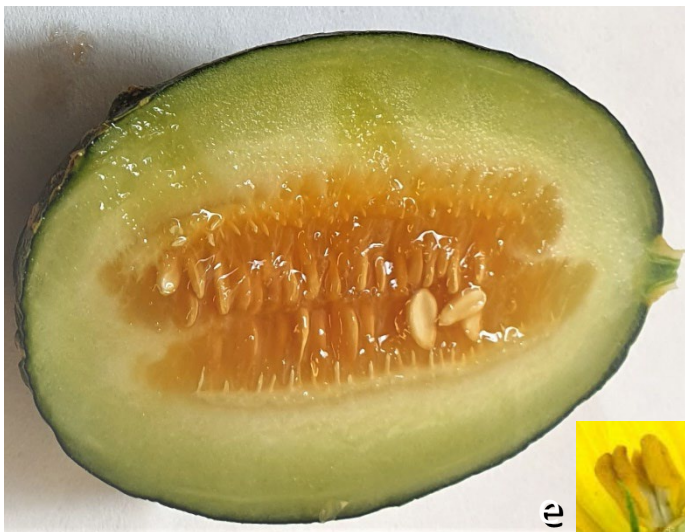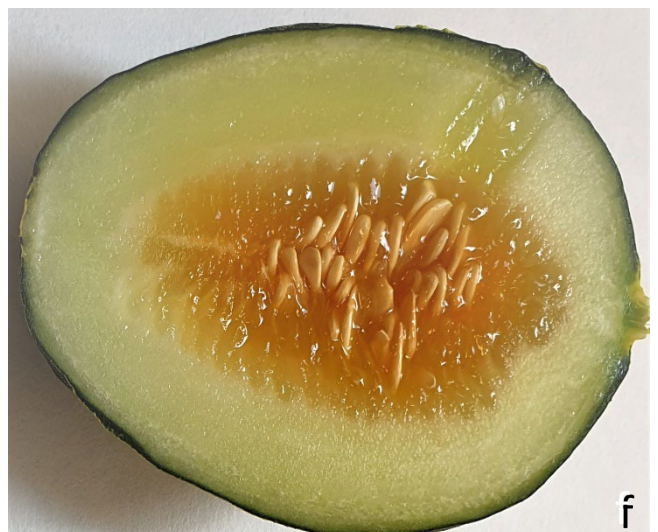

*C+* (not treated and pollinated)

*S* (treated with sulfur ( $S_8$ ) and pollinated)

Eggplant (*Solanum melongena* L.)

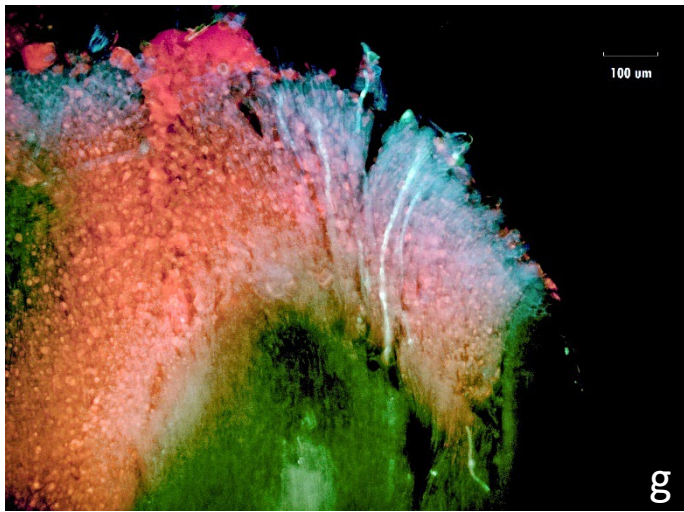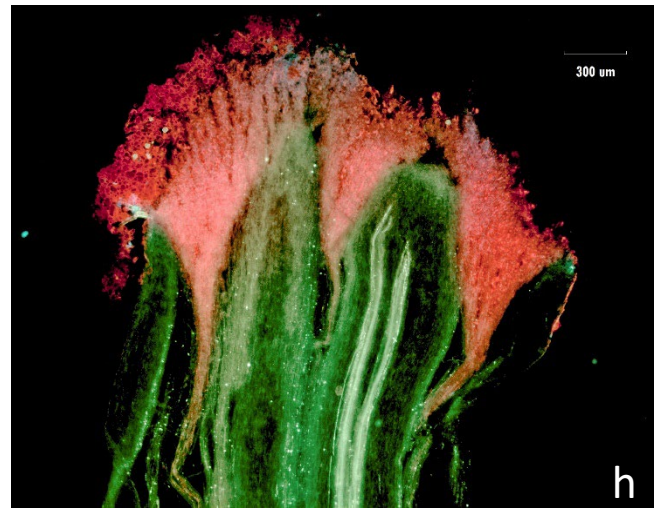

Watermelon (*Citrullus lanatus* (Thunb.)  
Matsumara & Nakai)

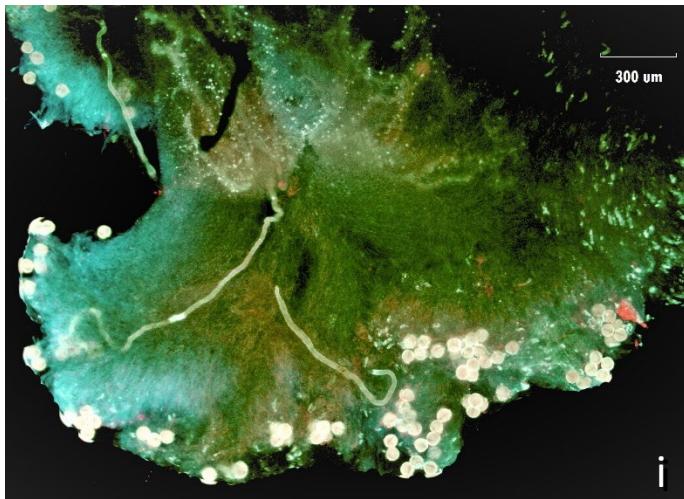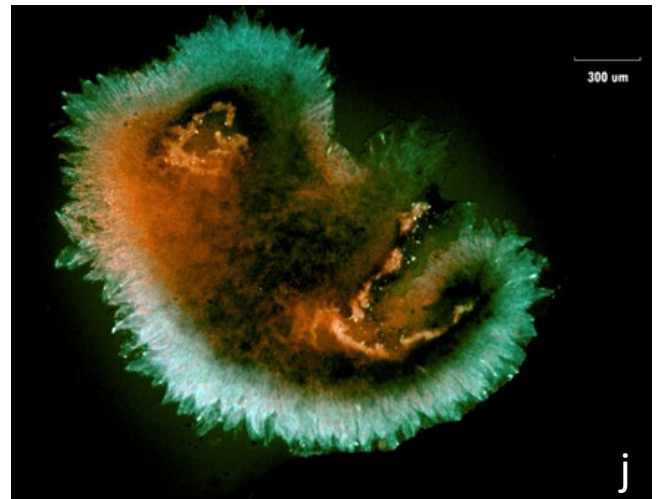

Supplement: s1 [file s1 › Figure S3.pdf]
