# Supplementary material
Source: MDPI journal article supplement (https://www.mdpi.com/2073-4395/13/6/1643)

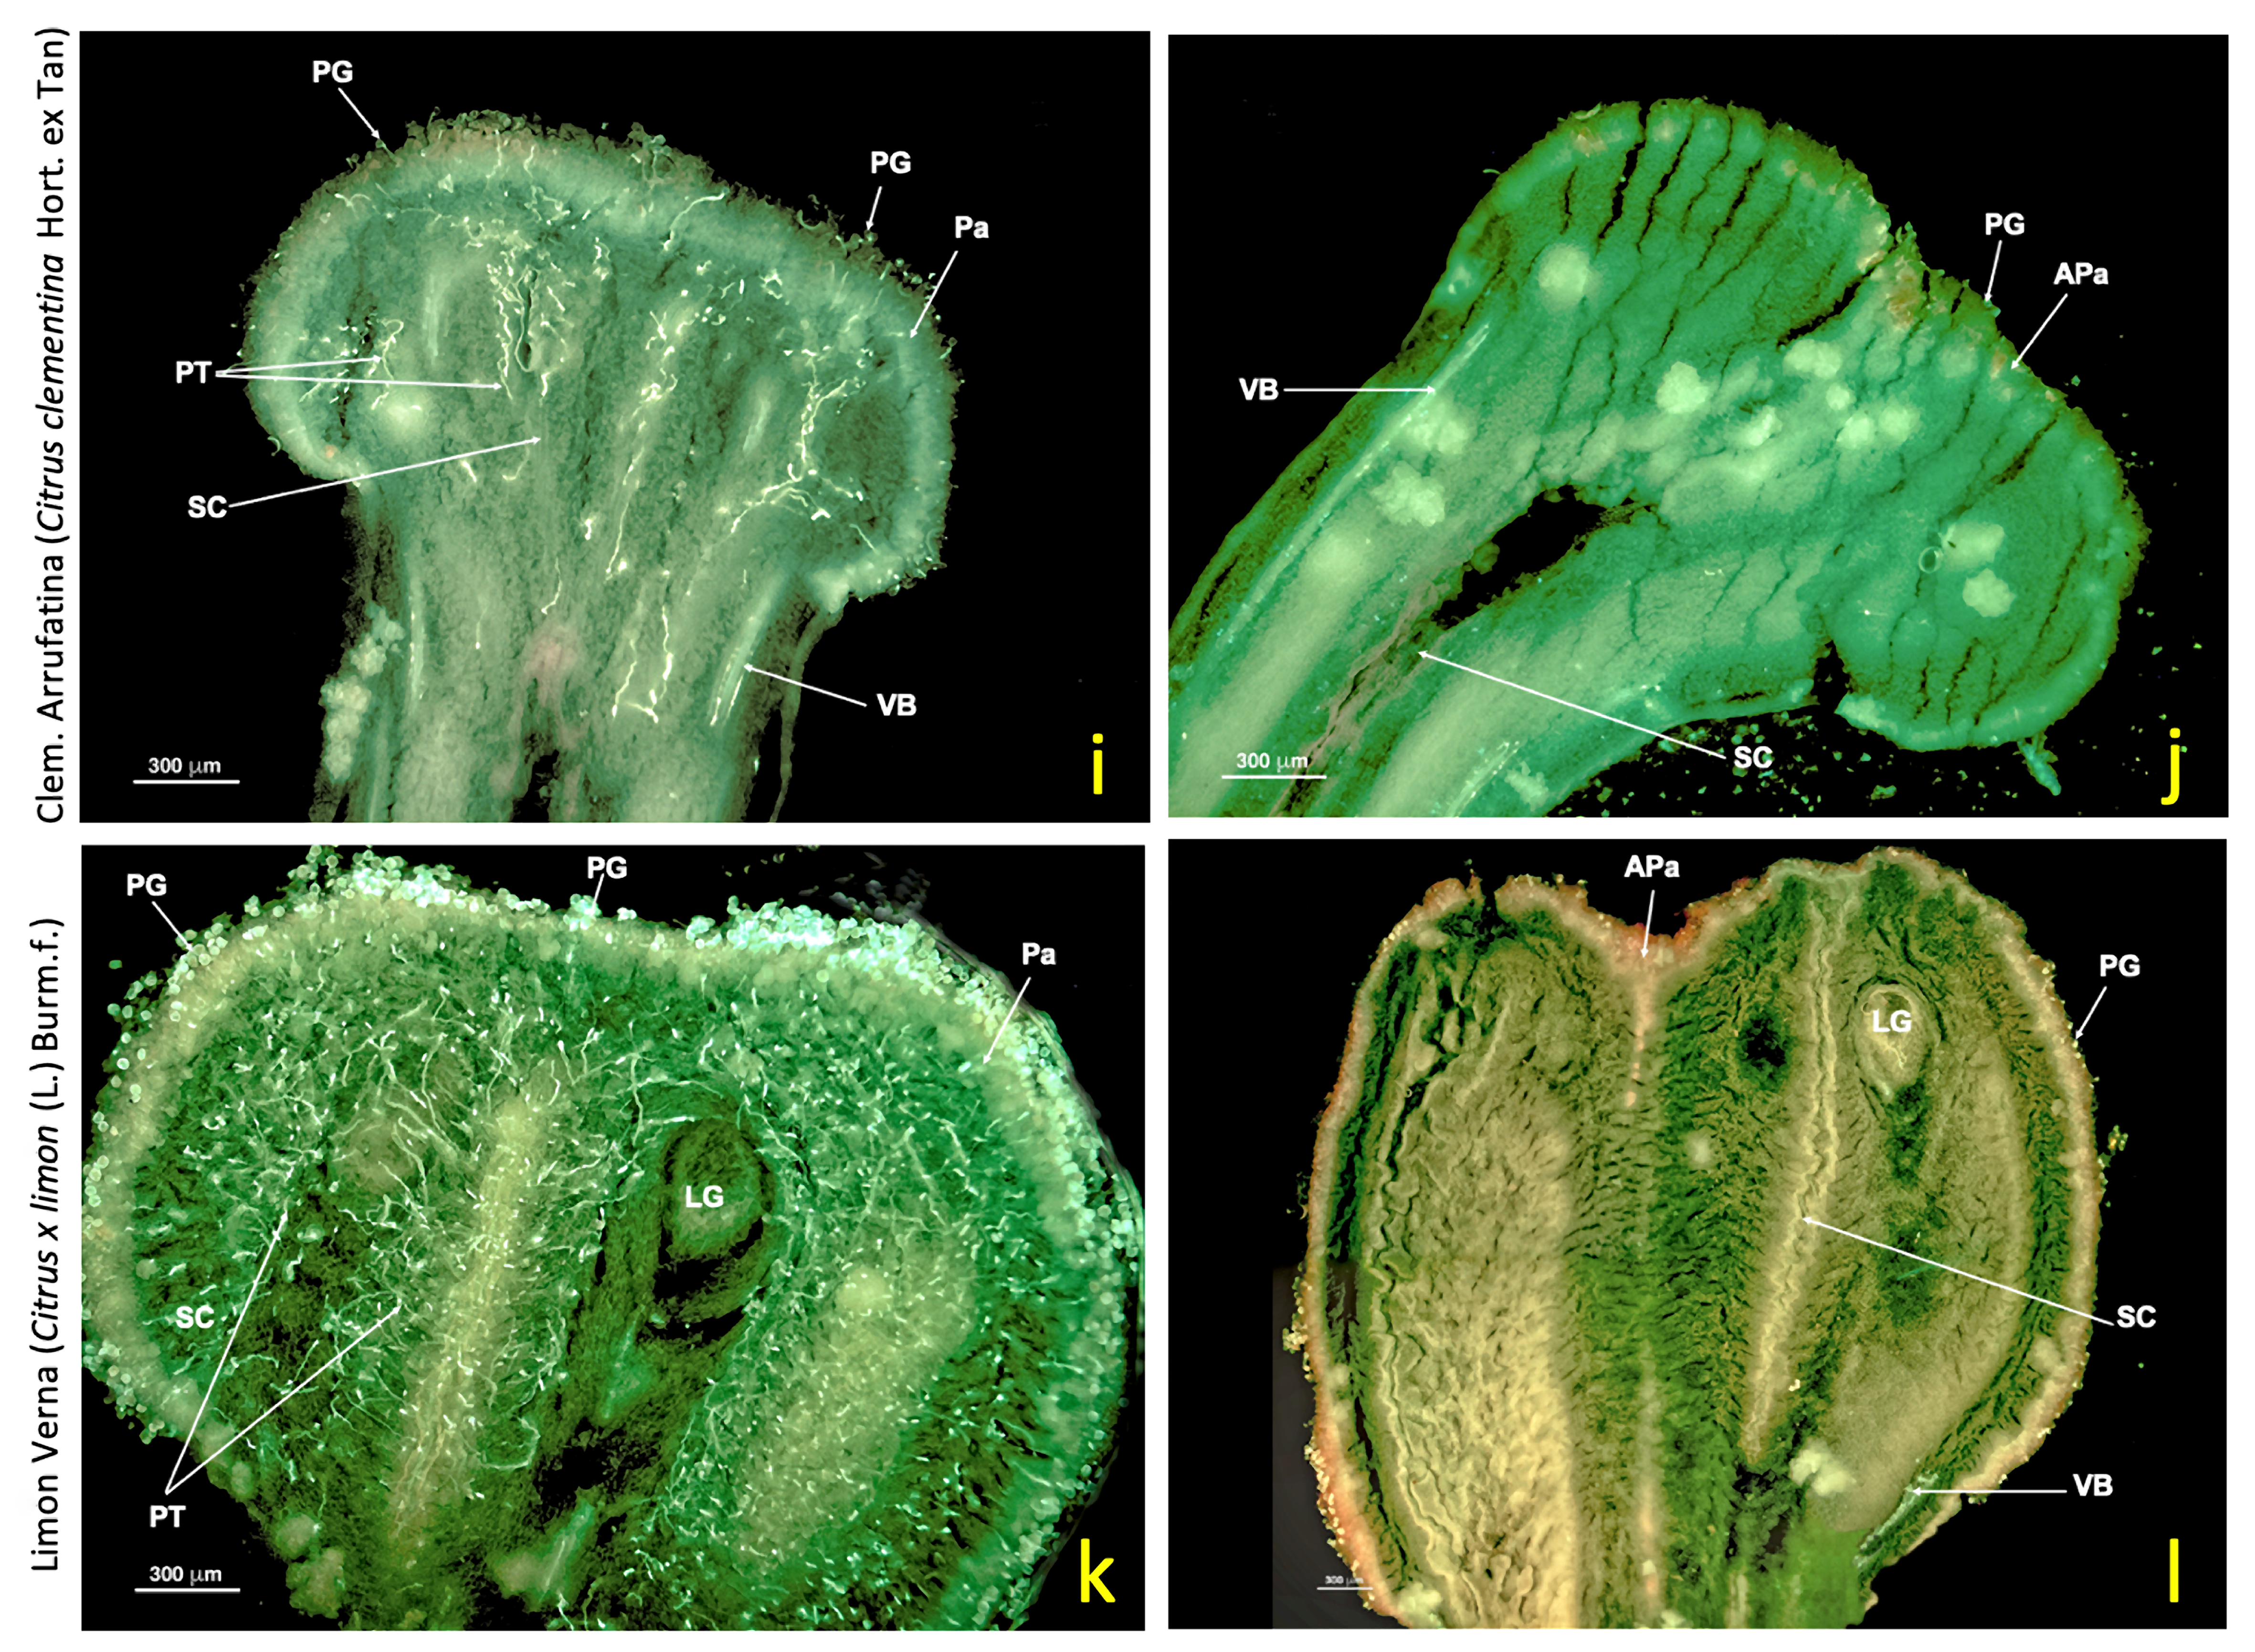

Supplement: s1 [file s1 › Figure S2 cont.tif]

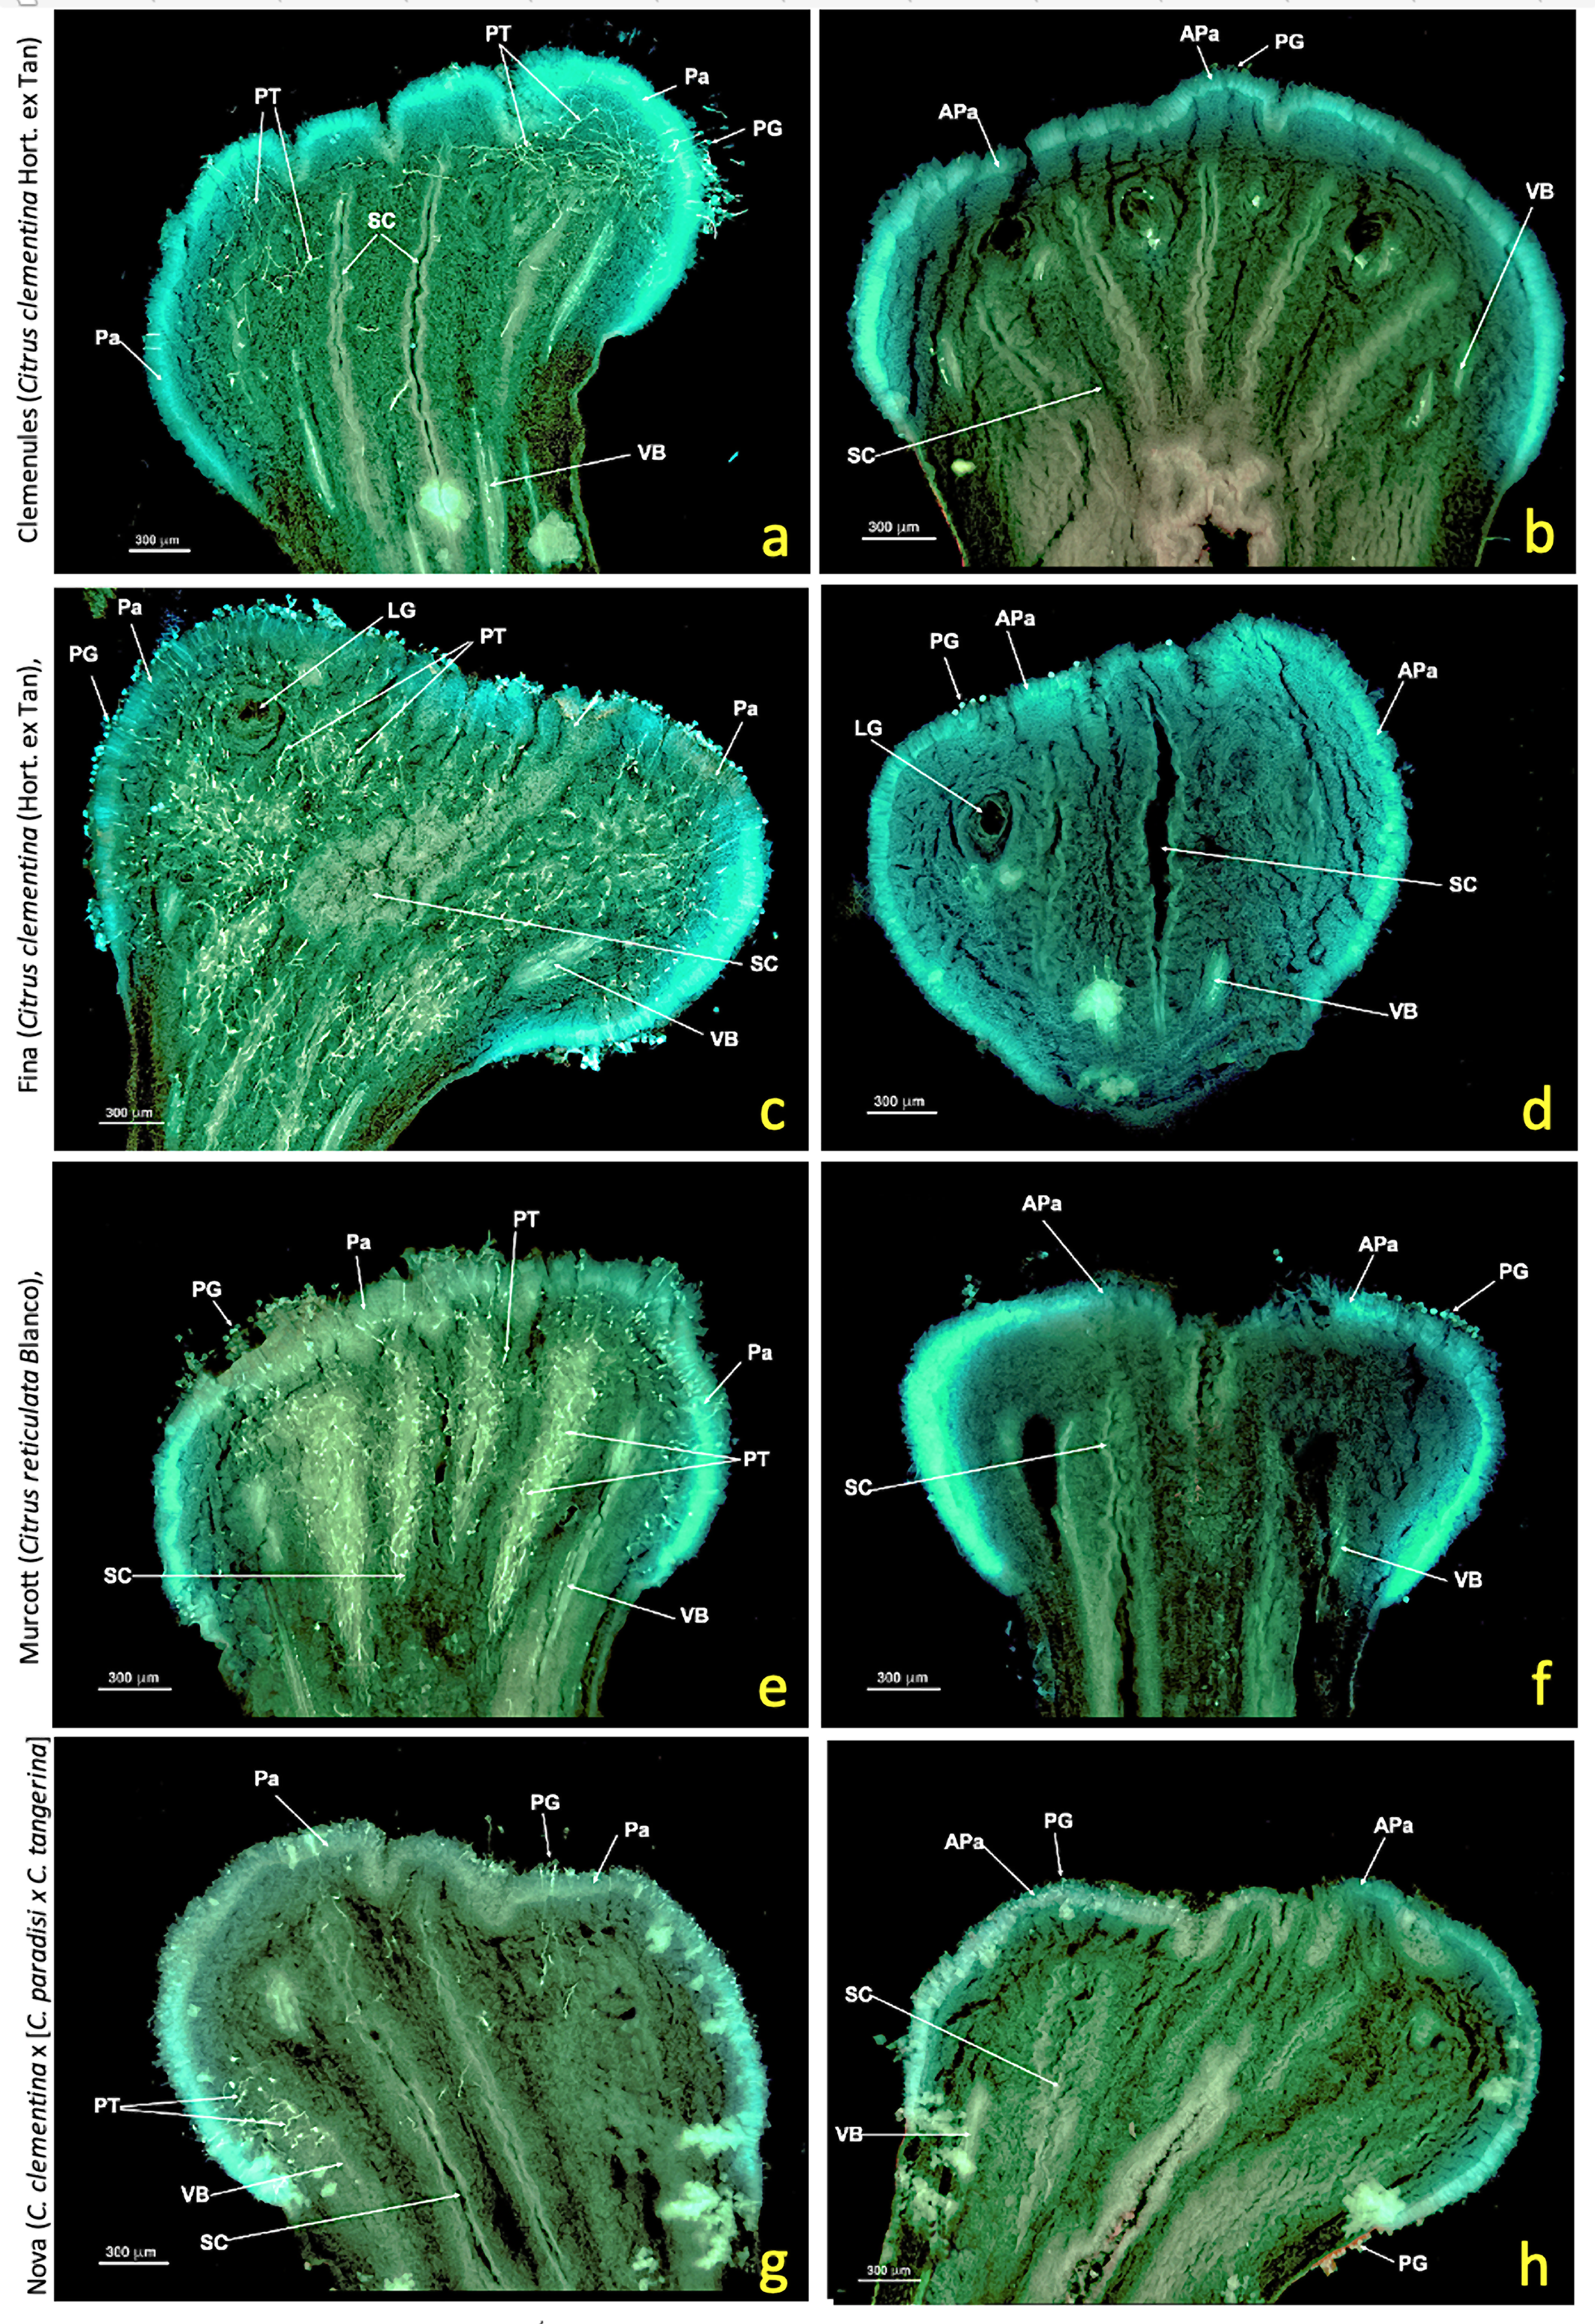

Supplement: s1 [file s1 › Figure S2.tif]
